# Supplementary material for: Cost of non-alcoholic steatohepatitis in Europe and the USA: The GAIN study
Source: PubMed Central journal article supplement — JHEP Rep. 2020 Jul 15;2(5):100142. doi: 10.1016/j.jhepr.2020.100142 (PMC7397699; doi:10.1016/j.jhepr.2020.100142), 2020-07-15
Supplement: mmc1.pdf [file mmc1.pdf]

# **Cost of non-alcoholic steatohepatitis in Europe and the USA: the GAIN study**

Jamie O'Hara, Alan Finnegan, Harpal Dhillon, Leonardo Ruiz-Casas, Gabriel Pedra,  
Bethany Franks, George Morgan, Vanessa Hebditch, Alison Orman, Bengt Jönsson,  
Mzwandile Mabhala, Tatjana Reic, Ingo Van Thiel, Vlad Ratziu, Manuel Romero-Gomez,  
Elisabetta Bugianesi, Jörn M. Schattenberg, Quentin M. Anstee

## Table of contents

|                         |   |
|-------------------------|---|
| Steering Committee..... | 2 |
| Table S1.....           | 3 |
| Table S2.....           | 3 |
| Table S3.....           | 4 |
| Table S4.....           | 5 |

## Steering Committee

| <b>Member</b>                                                 | <b>Affiliation</b>                                     | <b>Role</b>    |
|---------------------------------------------------------------|--------------------------------------------------------|----------------|
| <b>Professor Quentin Anstee</b>                               | Newcastle University, UK                               | Chair          |
| <b>Mr Ingo Van Thiel</b>                                      | Deutsche Leberhilfe e.V.,<br>Germany                   | Vice Chair     |
| <b>Mr Leonardo Ruiz</b>                                       | HCD Economics, Spain                                   | Project Lead   |
| <b>Ms. Bethany Franks</b>                                     | HCD Economics, UK                                      | Secretary      |
| <b>Professor Alan Finnegan</b>                                | University of Chester, UK                              | Representative |
| <b>Mrs Judy Rhys</b>                                          | British Liver Trust, UK                                | Representative |
| <b>Dr Mzwandile Mabhala</b>                                   | University of Chester, UK                              | Representative |
| <b>Professor Jörn M. Schattenberg,<br/>Johannes Gutenberg</b> | University of Mainz, Germany                           | Representative |
| <b>Professor Manuel Romero-<br/>Gomez</b>                     | University of Seville, Spain                           | Representative |
| <b>Professor Elisabetta Bugianesi</b>                         | University of Turin, Italy                             | Representative |
| <b>Professor Vlad Ratziu</b>                                  | Pitié-Salpêtrière Hospital, France                     | Representative |
| <b>Mrs Tatjana Reic</b>                                       | European Liver Patients<br>Association (ELPA), Belgium | Representative |
| <b>Professor Bengt Jönsson</b>                                | Stockholm School of Economics,<br>Sweden               | Representative |
| <b>Dr Anthony Hatswell</b>                                    | Delta Hat, University College<br>London, UK            | Representative |

**Table S1. GAIN study population: number of returned questionnaires from physicians and patients**

| <b>Country</b> | <b>Case Record Forms (CRFs)<br/>(physicians) returned</b> | <b>Patient Public Involvement<br/>Engagement (PPIEs) returned (%)</b> |
|----------------|-----------------------------------------------------------|-----------------------------------------------------------------------|
| France         | 508                                                       | 130 (26)                                                              |
| Germany        | 540                                                       | 132 (24)                                                              |
| Italy          | 540                                                       | 219 (41)                                                              |
| Spain          | 522                                                       | 169 (32)                                                              |
| UK             | 423                                                       | 20 (5)                                                                |
| USA            | 1,221                                                     | 97 (8)                                                                |
| All            | 3,754                                                     | 767 (20)                                                              |

**Table S2. Sources of NASH costs by country**

| <b>Country</b> | <b>Resources</b>                                                                                                                                                        |
|----------------|-------------------------------------------------------------------------------------------------------------------------------------------------------------------------|
| France         | Ameli.fr, sante.gouv.fr, ViDAL.fr                                                                                                                                       |
| Germany        | Kbv.de, Meinpharmaversand.de, Einheitlicher Bewertungsmaßstab, Rote-liste Service                                                                                       |
| Italy          | trovanorme.salute.gov.it, Ordinary supplement n. 8 to the Official Journal, Tariffa Minima Degli Onorari per le Prestazioni Medico-Chirurgiche, starbene.it drug search |
| Spain          | Oblikue e-salud, Agencia Española de Medicamentos y Productos Sanitarios, regional orders by the Ministry of Health                                                     |

UK National Schedule of Reference Costs, the electronic Medicines Compendium, NICE British National Formulary

US Medicaid NADAC database (National Average Drug Acquisition Cost), Centre for Medicare and Medicaid Service (CMS), Physician Fee Schedule, American Medical Association

|               |                                                                                                                                       |
|---------------|---------------------------------------------------------------------------------------------------------------------------------------|
| All countries | World Health Organisation, OECD statistics ( <a href="http://www.data.oecd.org">www.data.oecd.org</a> ), grey literature, and reports |
|---------------|---------------------------------------------------------------------------------------------------------------------------------------|

**Table S3. Mean annual direct NASH-related costs (SD)<sup>a</sup>**

| Cost                     | NASH stage         |                    | Country           |                    |                   |                   |                   |                    | Overall            |
|--------------------------|--------------------|--------------------|-------------------|--------------------|-------------------|-------------------|-------------------|--------------------|--------------------|
|                          | Early              | Advanced           | Germany           | Spain              | France            | UK                | Italy             | USA                |                    |
| <i>n</i>                 | 2,604              | 1,150              | 540               | 522                | 508               | 423               | 540               | 1,221              | 3,754              |
| Direct cost              | €2,224<br>(19,956) | €3,983<br>(23,788) | €1,917<br>(7,715) | €2,162<br>(10,220) | €1,357<br>(5,427) | €1,851<br>(2,406) | €1,732<br>(7,799) | €4,881<br>(42,077) | €2,763<br>(21,216) |
| Health related, <i>n</i> | 2,604              | 1,150              | 540               | 522                | 508               | 423               | 540               | 1,221              | 3,754              |
| Procedure/test           | €265<br>(439)      | €323<br>(575)      | €183<br>(221)     | €168<br>(180)      | €124<br>(117)     | €415<br>(668)     | €220<br>(248)     | €435<br>(726)      | €283<br>(486)      |
| NASH Tx                  | €989<br>(3,596)    | €1,373<br>(4,438)  | €655<br>(2,218)   | €739<br>(3,047)    | €502<br>(1,292)   | €624<br>(1,550)   | €431<br>(1,718)   | €2,241<br>(6,743)  | €1,106<br>(3,877)  |
| Surgery                  | €653<br>(19,609)   | €1,507<br>(22,420) | €848<br>(6,740)   | €735<br>(8,197)    | €228<br>(4,590)   | €103<br>(1,141)   | €573<br>(7,113)   | €1,582<br>(34,825) | €915<br>(20,512)   |
| Consultation             | €259<br>(298)      | €274<br>(348)      | €89 (90)          | €300<br>(312)      | €203<br>(197)     | €665<br>(487)     | €275<br>(224)     | €210<br>(291)      | €264<br>(314)      |

|           |       |         |       |         |         |       |         |        |         |
|-----------|-------|---------|-------|---------|---------|-------|---------|--------|---------|
| Hospitali | €58   | €507    | €143  | €219    | €300    | €56   | €233    | €201   | €195    |
| sation    | (815) | (3,561) | (967) | (2,203) | (1,669) | (443) | (1,232) | (3420) | (2,094) |

<sup>a</sup>NASH, non-alcoholic steatohepatitis; SD, standard deviation.

**Table S4. Mean annual non-NASH related direct costs (SD)<sup>a</sup>**

| Cost              | NASH stage |              | Country   |         |         |         |         |         | Overall |
|-------------------|------------|--------------|-----------|---------|---------|---------|---------|---------|---------|
|                   | Early      | Advance<br>d | Germany   | Spain   | France  | UK      | Italy   | USA     |         |
| Direct            | €1,659     | €2,743       | €1,712    | €1,161  | €1,082  | €2,027  | €1,006  | €2,957  | €1,991  |
| cost              | (4,117)    | (6,107)      | (3,698)   | (3,200) | (2,234) | (2,897) | (2,397) | (7,170) | (4,840) |
| Health            | 2,604      | 1,150        | 540       | 522     | 508     | 423     | 540     | 1,221   | 3,754   |
| related, <i>n</i> |            |              |           |         |         |         |         |         |         |
| Concomit          | €1,307     | €2,122       | €1,515    | €744    | €677    | €1,252  | €526    | €2,578  | €1,557  |
| ant Tx            | (3,925)    | (5,435)      | (3,602)   | (3,046) | (1,603) | (2,382) | (1,839) | (6,601) | (4,457) |
| Hospitalis        | €86        | €318         | €98 (706) | €124    | €206    | €60     | €195    | €175    | €157    |
| ation             | (761)      | (2,474)      |           | (674)   | (1,241) | (400)   | (1,310) | (2,268) | (1,512) |
| Consultati        | €267       | €303         | €99 (135) | €293    | €200    | €715    | €286    | €204    | €278    |
| on                | (376)      | (444)        |           | (342)   | (256)   | (685)   | (274)   | (267)   | (399)   |

<sup>a</sup>NASH, non-alcoholic steatohepatitis; SD, standard deviation; Tx, treatment.
