# Supplementary material for: Cost of non-alcoholic steatohepatitis in Europe and the USA: The GAIN study
Source: PubMed Central journal article supplement — JHEP Rep. 2020 Jul 15;2(5):100142. doi: 10.1016/j.jhepr.2020.100142 (PMC7397699; doi:10.1016/j.jhepr.2020.100142), 2020-07-15
Supplement: mmc2.pdf [file mmc2.pdf]

## JHEP Reports

### CTAT methods

Tables for a “Complete, Transparent, Accurate and Timely account” (CTAT) are now mandatory for all revised submissions. The aim is to enhance the reproducibility of methods.

- Only include the parts relevant to your study
- Refer to the CTAT in the main text as ‘Supplementary CTAT Table’
- Do not add subheadings
- Add as many rows as needed to include all information
- Only include one item per row

**If the CTAT form is not relevant to your study, please outline the reasons why:**

This was an observational, retrospective, non-interventional study, for which none of the items/substances below were required.

#### 1.1 Antibodies

| Name | Citation | Supplier | Cat no. | Clone no. |
|------|----------|----------|---------|-----------|
| N/A  |          |          |         |           |

#### 1.2 Cell lines

| Name | Citation | Supplier | Cat no. | Passage no. | Authentication test method |
|------|----------|----------|---------|-------------|----------------------------|
| N/A  |          |          |         |             |                            |

#### 1.3 Organisms

| Name | Citation | Supplier | Strain | Sex | Age | Overall n number |
|------|----------|----------|--------|-----|-----|------------------|
| N/A  |          |          |        |     |     |                  |

#### 1.4 Sequence based reagents

| Name | Sequence | Supplier |
|------|----------|----------|
| N/A  |          |          |

#### 1.5 Biological samples

| Description | Source | Identifier |
|-------------|--------|------------|
| N/A         |        |            |

#### 1.6 Deposited data

| Name of repository | Identifier | Link |
|--------------------|------------|------|
| N/A                |            |      |

## 1.7 Software

| Software name | Manufacturer | Version |
|---------------|--------------|---------|
| N/A           |              |         |

## 1.8 Other (e.g. drugs, proteins, vectors etc.)

|     |  |  |
|-----|--|--|
| N/A |  |  |
|     |  |  |

## 1.9 Please provide the details of the corresponding methods author for the manuscript:

|                                                                                                                                                                                                                                                     |
|-----------------------------------------------------------------------------------------------------------------------------------------------------------------------------------------------------------------------------------------------------|
| <b>Corresponding methods author:</b> Bethany Franks, HCD Economics, The Innovation Centre, Keckwick Lane, Daresbury, WA4 4FS, UK. Tel: 01925 606475.<br>Email: <a href="mailto:bethany.franks@hcdeconomics.com">bethany.franks@hcdeconomics.com</a> |
|-----------------------------------------------------------------------------------------------------------------------------------------------------------------------------------------------------------------------------------------------------|

## 2.0 Please confirm for randomised controlled trials all versions of the clinical protocol are included in the submission. These will be published online as supplementary information.

|     |
|-----|
| N/A |
|-----|
